# Supplementary material
Source: publisher figshare collection journal article supplement (https://aacr.figshare.com/ndownloader/files/39937518)

SUPPLEMENTARY FIGURE 1

a)

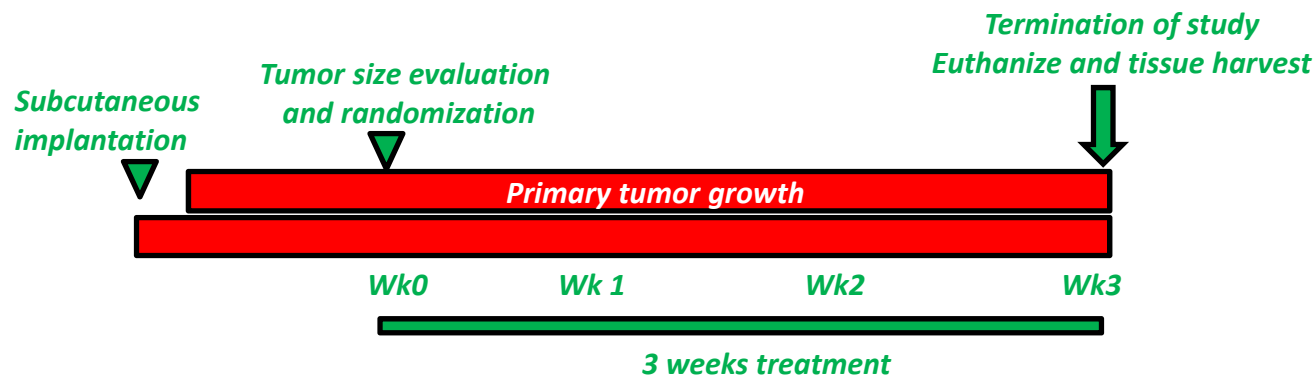

b)

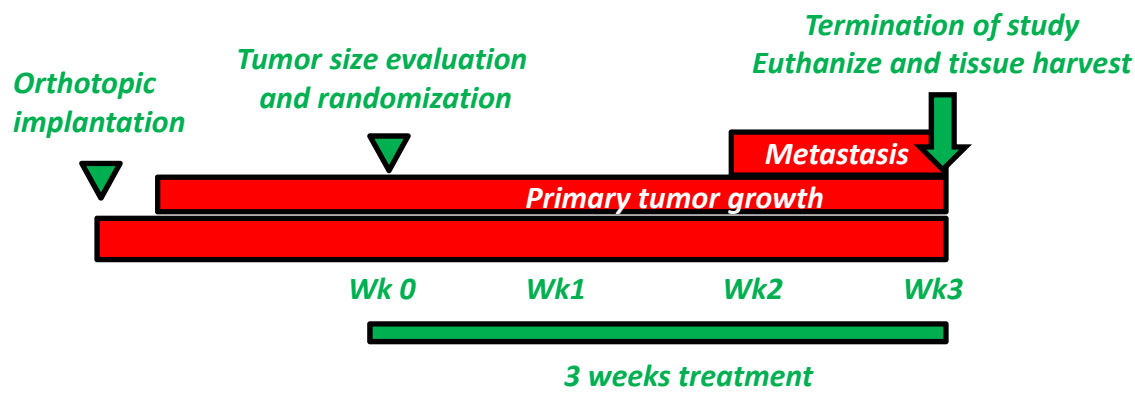

Supplement: Supplementary file 1 [file 39937518]
